# Supplementary material for: Stable and permeable polyion complex vesicles designed as enzymatic nanoreactors
Source: Royal Society of Chemistry journal article supplement (doi:10.1039/d4sm00216d), 2024-01-01
Supplement: d4sm00216d1.pdf [file d4sm00216d1.pdf]

# Stable and Permeable Polyion Complex Vesicles Designed as Enzymatic Nanoreactors

Yuting Wan, Yuening Qiu, Jin Zhou, Jinbo Liu, Martien A. Cohen Stuart, Yangfeng Peng\*  
and Junyou Wang\*

*State-Key Laboratory of Chemical Engineering, and Shanghai Key Laboratory of Multiphase  
Materials Chemical Engineering, East China University of Science and Technology, 130  
Meilong Road, 200237, Shanghai, People's Republic of China*

Corresponding author: [junyouwang@ecust.edu.cn](mailto:junyouwang@ecust.edu.cn), [yfpeng@ecust.edu.cn](mailto:yfpeng@ecust.edu.cn).

This PDF file includes:

1.  $^1\text{H}$  NMR spectrum of PSS<sub>96</sub>-*b*-PEO<sub>113</sub> (Figure S1)
2. Size distribution of formed vesicles before and after remove of the salt. (Figure S2)
3. TEM image of PIC vesicles prepared at  $f_{+/-} = 1.1$  (Figure S3)
4. Average diameter and membrane thickness based on TEM image (Table S1)
5. Angular dependence of the diffusion coefficient  $D$  of PIC vesicles (Figure S4)
6. Static light scattering results ( $KC/R$  vs  $q^2$ ) of PIC vesicles (Figure S5)
7. Light scattering intensity,  $R_h$  and PDI over time of PIC vesicles (Figure S6)
8. Mixing UOX and PEI at different salt concentrations at pH 6.0 (Figure S7)
9. The radius distribution of different mixtures prepared at  $f_{+/-} = 1.1$  (Figure S8)
10. TEM image of UOX-loaded vesicles prepared at  $f_{+/-} = 1.1$  (FigureS9)
11. Fluorescence emission of Dex solution and Dex-loaded vesicles after 24h dialysis  
( $\lambda_{\text{ex}} = 550$  nm) (FigureS10)
12. Normalized intensity and size distribution of Dex-loaded vesicles before and after  
dialysis. (FigureS11)

13. Encapsulation efficiency (EE), encapsulation amount (EA) and relative enzymatic activity of UOX-loaded vesicles prepared at different vesicle concentrations.

(Figure S12)

14. TEM image of HRP-loaded vesicles prepared at  $f_{+/-} = 1.1$ .

(FigureS13)

Figure S1

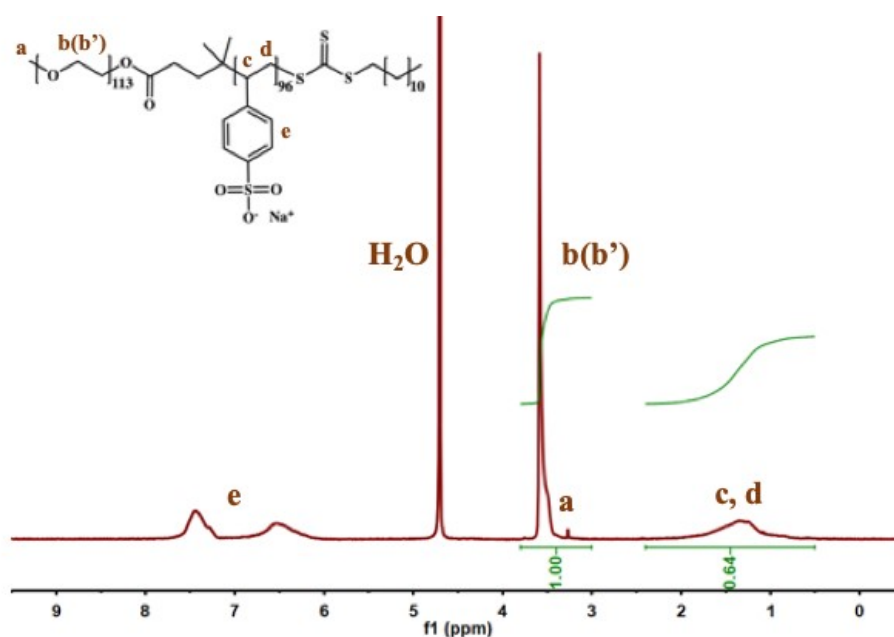

Figure S1.  $^1\text{H}$  NMR spectrum of  $\text{PSS}_{96}\text{-}b\text{-PEO}_{113}$ .

It can be observed from Figure S1:  $\delta$  0.5-2.4 (3H,  $\text{CHCH}_2$ , c, d),  $\delta$  3.4 (3H,  $\text{CH}_2$ , a),  $\delta$  3.6 (4H,  $\text{CH}_2\text{CH}_2\text{O}$ , b, b'),  $\delta$  6-7.6 (5 h, phenyl, e). There are no other peaks in the figure except the predicted peak of product structure and the solvent, which can determine that the product synthesized is pure. Next, we take the group  $\text{CH}_2\text{CH}_2\text{O}$  in polyethylene glycol (PEO) as the reference, and set its characteristic peak integral as 1, which can obtain the characteristic peak integral of  $\text{CHCH}_2$  in sodium polystyrenesulfonate (PSS) of 0.64, and calculate the polymerization degree of SS in our synthesized polymer of about 96.

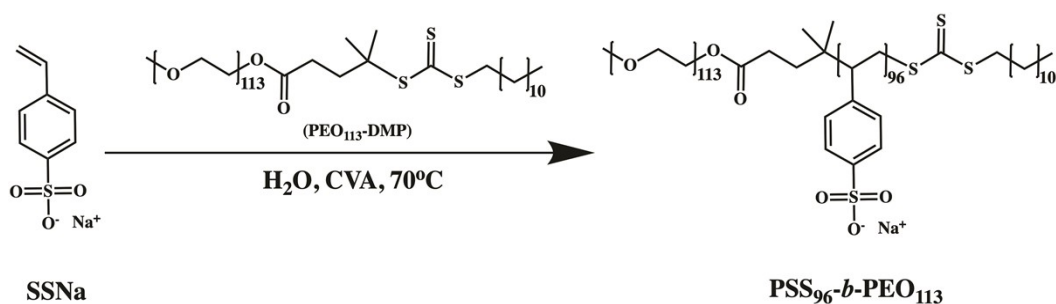

Reaction formula was used for the preparation of block copolymer  $\text{PSS}_{96}\text{-}b\text{-PEO}_{113}$

Figure S2

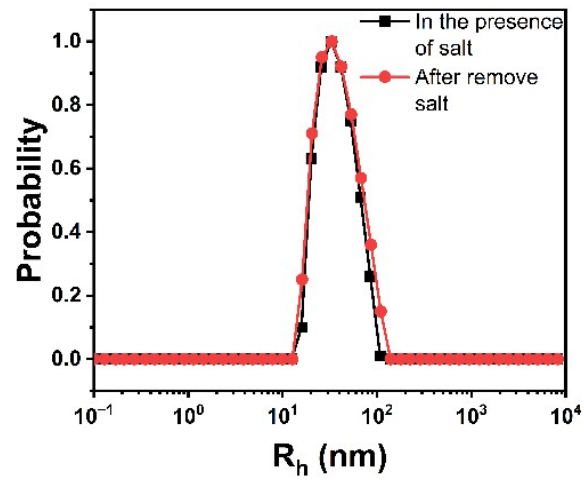

Figure S2. Size distribution of formed vesicles before and after remove of the salt.

**Figure S3**

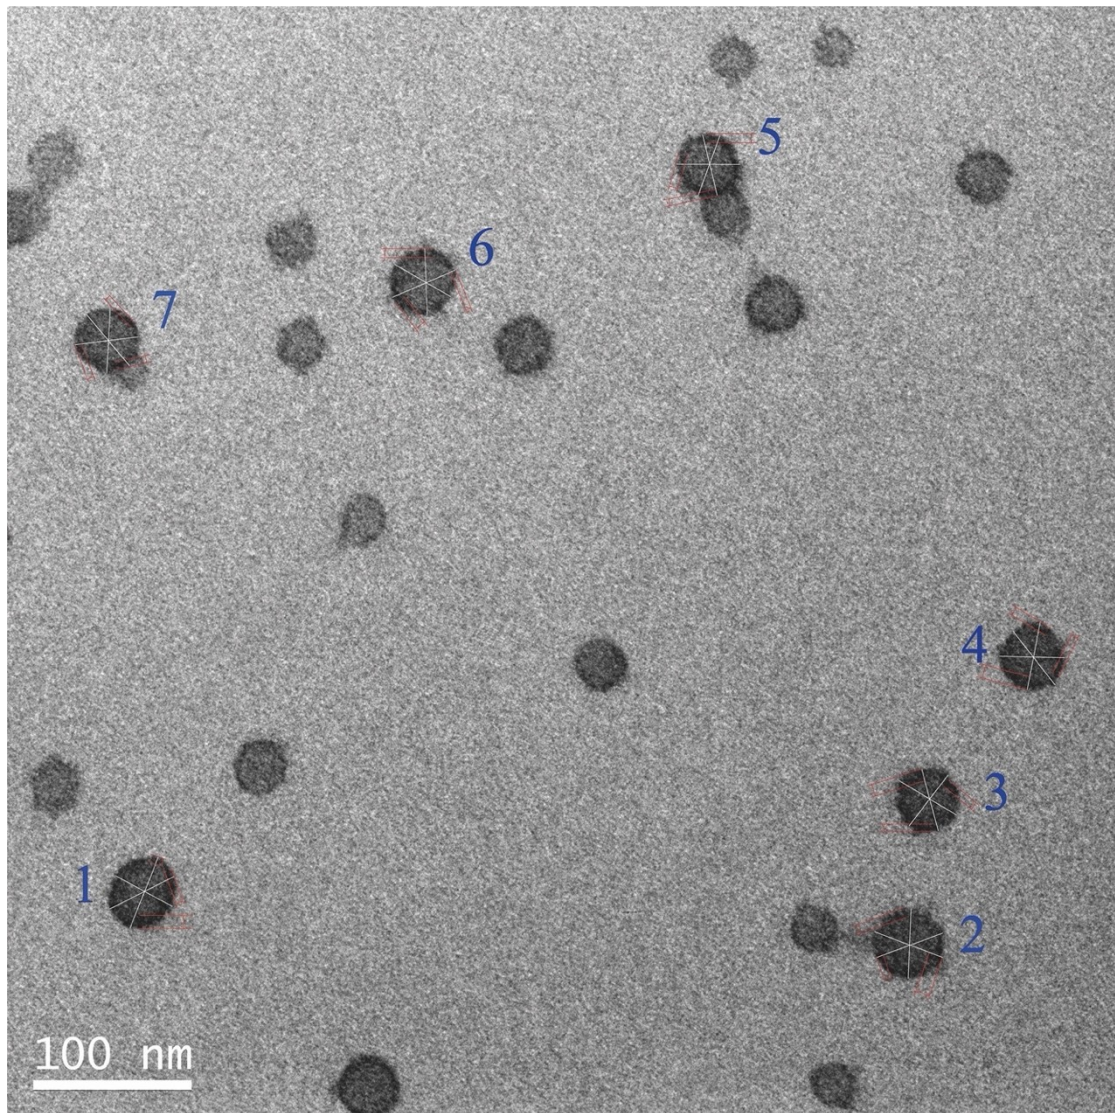

**Figure S3.** TEM image of PIC vesicles prepared at  $f_{+/-} = 1.1$

**Table S1.** Average diameter and membrane thickness based on TEM image of PIC vesicles prepared at  $f_{+/-} = 1.1$  ( **Figure S3** )

| <b>Number</b>             | <b>Average diameter (nm)</b> | <b>Average membrane thickness (nm)</b> |
|---------------------------|------------------------------|----------------------------------------|
| <b>1</b>                  | 46.0                         | 6.1                                    |
| <b>2</b>                  | 44.7                         | 6.5                                    |
| <b>3</b>                  | 41.3                         | 5.8                                    |
| <b>4</b>                  | 42.8                         | 6.1                                    |
| <b>5</b>                  | 40.2                         | 5.2                                    |
| <b>6</b>                  | 42.2                         | 5.3                                    |
| <b>7</b>                  | 41.5                         | 4.3                                    |
| <b>Average</b>            | <b>42.7</b>                  | <b>5.6</b>                             |
| <b>Standard deviation</b> | <b>2.0</b>                   | <b>0.7</b>                             |

According to TEM image of PIC vesicles prepared at  $f_{+/-} = 1.1$  (Figure S3) , the diameter and membrane thickness of each vesicle were measured three times on average at different locations.

Figure S4

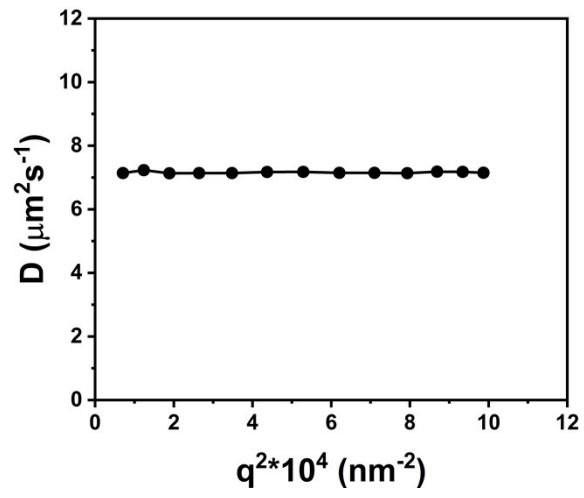

Figure S4. Angular dependence of the diffusion coefficient  $D$  of PIC vesicles prepared at  $f_{+/-} = 1.1$ .

Figure S5

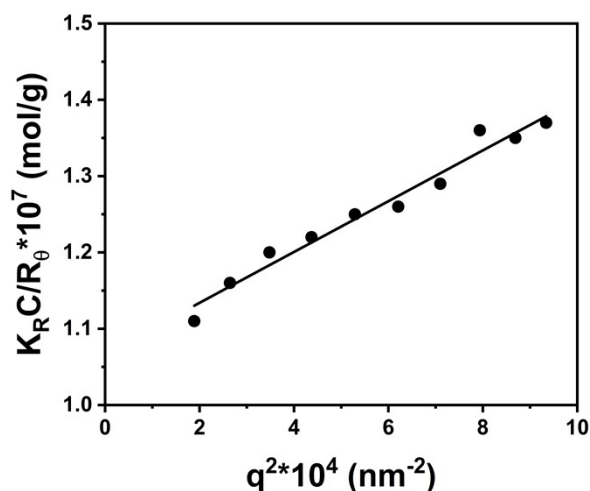

**Figure S5.** Static light scattering results ( $K_C/R$  vs  $q^2$ ) of PIC vesicles prepared at  $f_{+/-} = 1.1$ .

The Zimm plots were recorded from 50° to 140° at intervals of 10°, while with one polymer concentration of about 0.164 g/L. The refractive index increment ( $dn/dc$ ) was determined from the weight average of the component,<sup>1-3</sup> which is about 0.1576 mL/g. The estimated  $R_g$  is about 37.9 nm. The molecular weight of the PIC vesicles is obtained from the intercept, which is about  $2.3 \times 10^7$  g/mol. According to the Mw and molecular weight of PEI and PSS<sub>96</sub>-*b*-PEO<sub>113</sub>, together with the charge mixing ratio +/- of 1.1/1, we can calculate the aggregation number of one PIC vesicle, which is formed by 2512 PEI and 745 PSS<sub>96</sub>-*b*-PEO<sub>113</sub>.



**Figure S6**

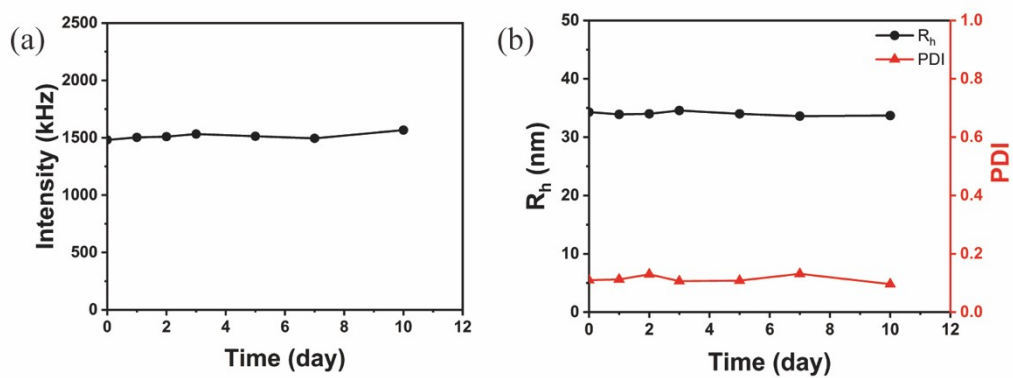

**Figure S6.** Light scattering intensity,  $R_h$  and PDI over time of PIC vesicles prepared at

$f_{+/-} = 1.1$ .

**Figure S7**

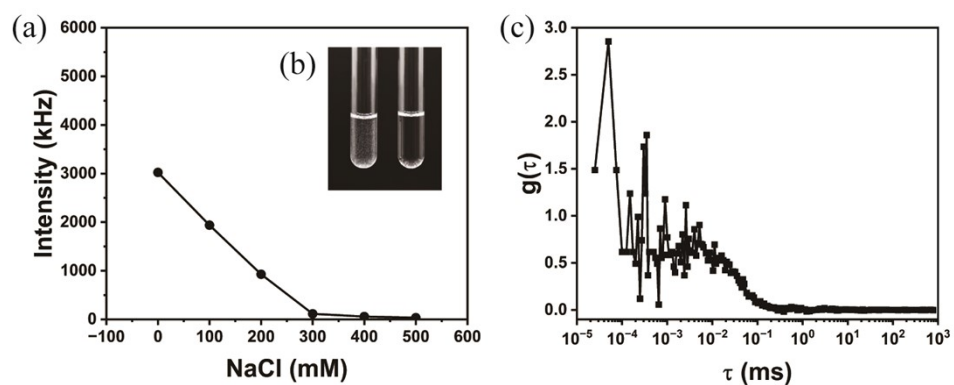

**Figure S7.** (a) The scattering intensity of mixing UOX and PEI at different NaCl concentrations. (b) Solution of mixing UOX and PEI with 0 mM (left) and 500 mM (right) NaCl. (c) Autocorrelation decay function of UOX and PEI at 500 mM NaCl. [UOX]=200  $\mu\text{g/mL}$ , [PEI] = 0.55 mM, pH=6.0.

**Figure S8**

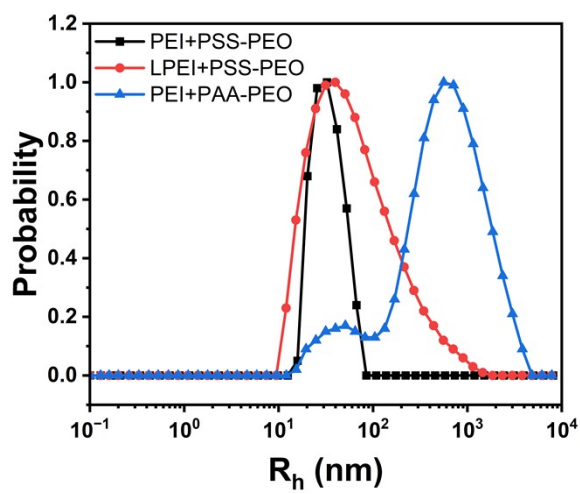

**Figure S8.** The radius distribution of different mixtures at pH 6.0 ( $f_{+/-} = 1.1$ ).

**Figure S9**

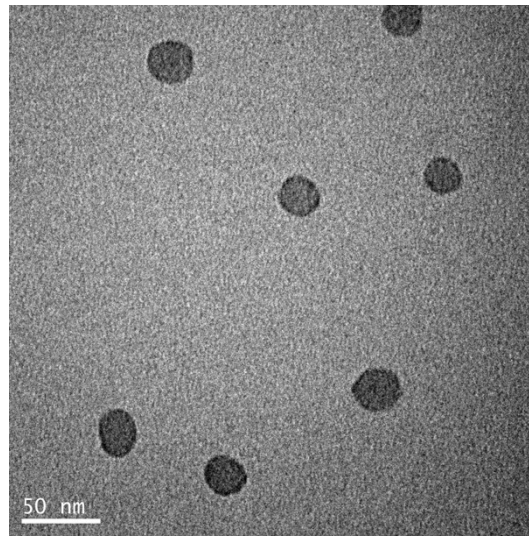

**Figure S9.** TEM image of UOX-loaded vesicles prepared at  $f_{+/-} = 1.1$ .

**Figure S10**

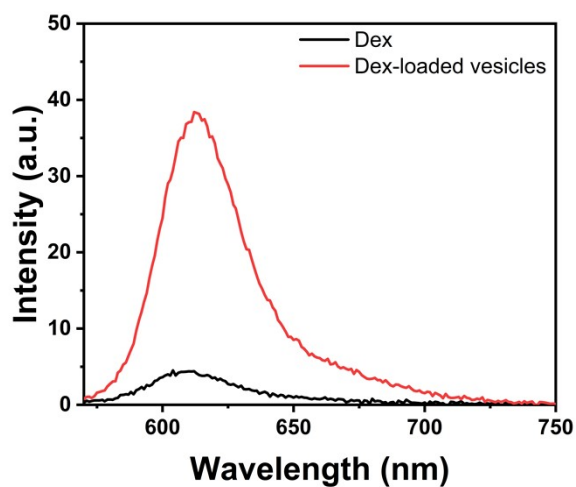

**Figure S10.** Fluorescence emission of free Dex and Dex-loaded vesicles after 24h dialysis ( $\lambda_{\text{ex}} = 550 \text{ nm}$ ).

Figure S10 shows after 24h dialysis, there was almost no fluorescence emission in the free Dex solution. This result confirms that, the first 24h dialysis shall be enough to remove the un-loaded Dex in the Dex-vesicle solution. In other words, the remained Dex (as evidenced by the fluorescence emission) shall be loaded in the PIC vesicles. The encapsulation efficiency of Dex is obtained by the ratio of residual fluorescence intensity to initial fluorescence intensity of the solution, which is about 7.5%. Then the following dialysis was implemented to monitor the release of the Dex.

**Figure S11**

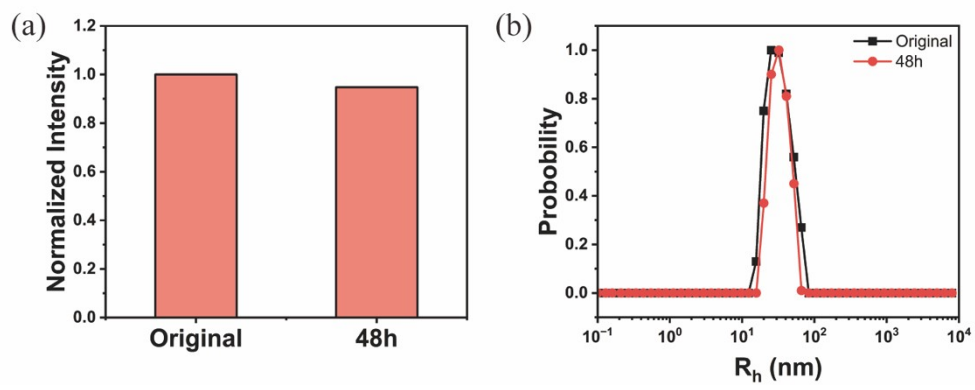

**Figure S11.** (a) Normalized intensity and (b) size distribution of Dex-loaded vesicles before and after dialysis.

**Figure S12**

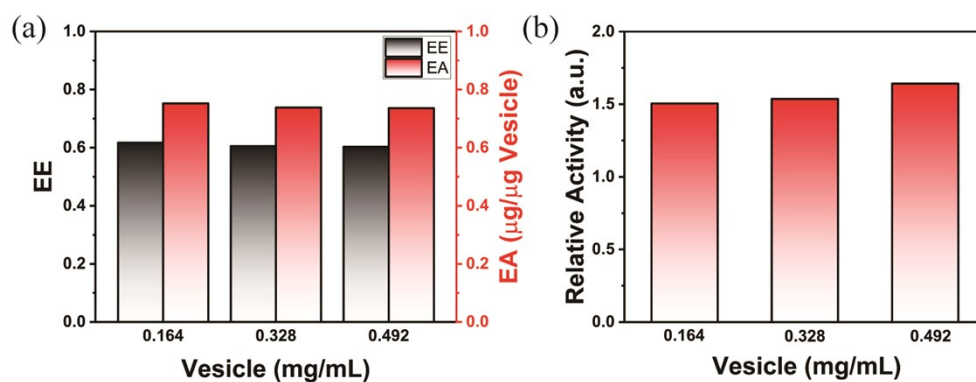

**Figure S12.** (a) Encapsulation efficiency (EE) and encapsulation amount (EA), (b) relative enzymatic activity of UOX-loaded vesicles prepared at different vesicle concentrations. The input enzyme loading was fixed at 200 μg/164 μg (UOX/vesicle).

**Figure S13**

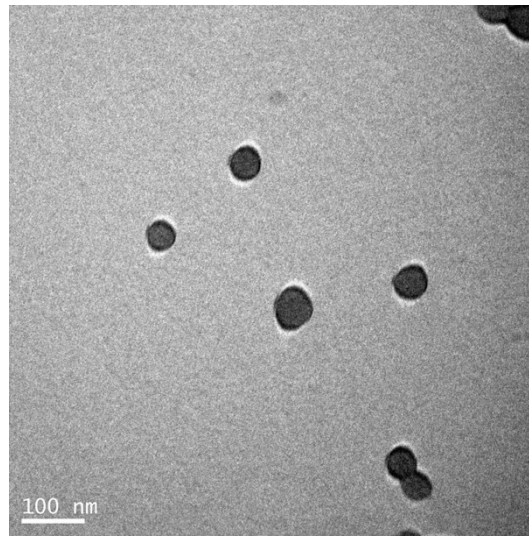

**Figure S13.** TEM image of HRP-loaded vesicles prepared at  $f_{+/-} = 1.1$ .



## Reference:

1. I. H. P. a. E.-J. Choi, *Polymer*, 1996, **37**, 313-319.
2. W. Zhang, M. L. Coughlin, J. M. Metzger, B. J. Hackel, F. S. Bates and T. P. Lodge, *Langmuir*, 2019, **35**, 7231-7241.
3. S. Prelesnik, S. Larin, V. Aseyev, H. Tenhu and K. Kogej, *J. Phys. Chem. B*, 2011, **115**, 3793-3803.
